# Supplementary material for: Supercritical CO2-induced room-temperature ferromagnetism in two-dimensional MoO3−x
Source: Royal Society of Chemistry journal article supplement (doi:10.1039/d2im00028h), 2022-11-26
Supplement: d2im00028h1.pdf [file d2im00028h1.pdf]

Electronic Supplementary Material (ESI) for Industrial Chemistry  
& Materials.

This journal is © The Royal Society of Chemistry 2022

## Supporting Information

### Supercritical $\text{CO}_2$ -induced Room-temperature Ferromagnetism in Two-dimensional $\text{MoO}_{3-x}$

Wei Liu<sup>a</sup> and Qun Xu <sup>\*ab</sup>

<sup>a</sup> Henan Institutes of advanced technology, Zhengzhou University, Zhengzhou 450052, P.R. China.

<sup>b</sup> Department of Materials Science and Engineering, Zhengzhou University, Zhengzhou 450052, China

E-mail: qunxu@zzu.edu.cn

Table S1. Magnetic properties of the reported various undoped and transition metal-doped molybdenum oxides.

| Material                 | $M_s$ (emu g <sup>-1</sup> ) | $M_r$ (emu g <sup>-1</sup> ) | $H_c$ (Oe) | $T_c$ (K) | Ref.      |
|--------------------------|------------------------------|------------------------------|------------|-----------|-----------|
| MoO <sub>3</sub>         | $2.96 \times 10^{-4}$        | $8.10 \times 10^{-6}$        | 56.38      | >300K     | 1         |
| MoO <sub>3</sub>         | $5.43 \times 10^{-4}$        | $9.82 \times 10^{-6}$        | 26.41      | >300K     | 2         |
| MoO <sub>3</sub>         | $1.46 \times 10^{-2}$        | -                            | 144        | >300K     | 3         |
| MoO <sub>3</sub>         | $2.78 \times 10^{-2}$        | $1.52 \times 10^{-2}$        | 56         | >300K     | 4         |
| MoO <sub>3</sub> :Co(2%) | $3.25 \times 10^{-4}$        | $5.49 \times 10^{-6}$        | 64.8       | >300K     | 1         |
| MoO <sub>3</sub> :H      | $1.7 \times 10^{-2}$         | -                            | 127        | >300K     | 5         |
| MoO <sub>3</sub> :Te     | $4.2 \times 10^{-2}$         | $7.1 \times 10^{-3}$         | 72.7       | >350K     | 6         |
| MoO <sub>3-x</sub>       | $1.0 \times 10^{-2}$         | $1.0 \times 10^{-3}$         | 52         | >380K     | This work |

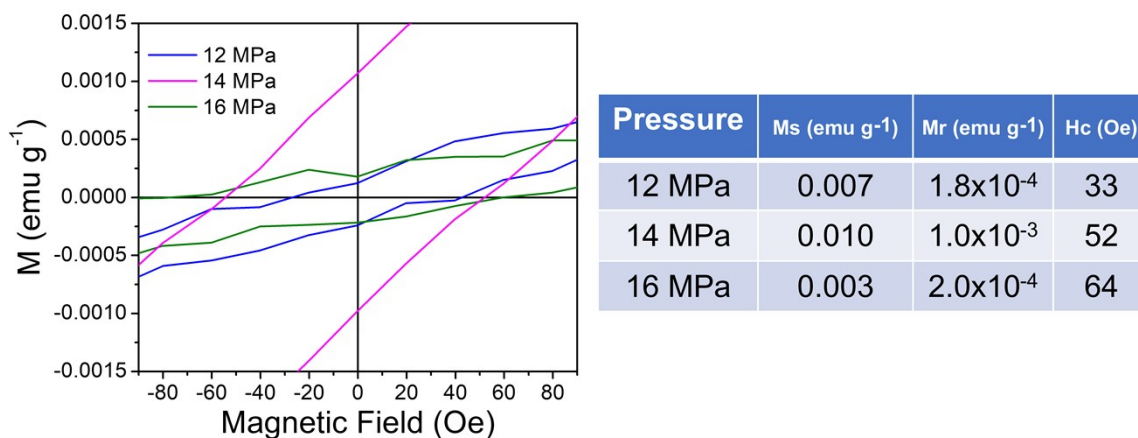

Fig. S1. The magnified curves near  $H=0$  of magnetization hysteresis loop and magnetic properties of the  $\text{MoO}_{3-x}$  sample obtained at 12 MPa, 14MPa, 16MPa at 300 K.

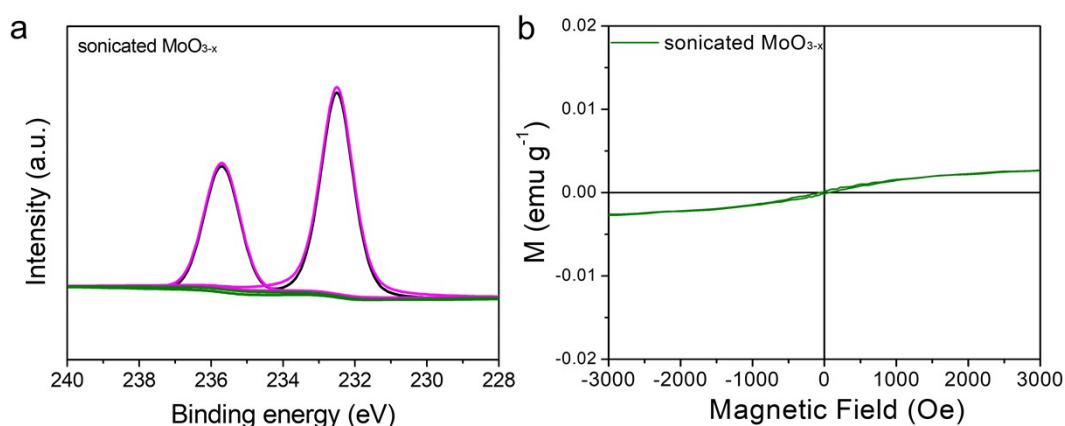

Fig. S2. XPS spectrum detail of Mo 3d binding energy regions and magnetization hysteresis loop of the  $\text{MoO}_{3-x}$  nanosheets obtained by sonication treatment without SC  $\text{CO}_2$ .

## References

- 1 A. Boukhachem, M. Mokhtari, N. Benameur, A. Ziouche, M. Martínez, P. Petkova, M. Ghamnia, A. Cobo, M. Zergoug and M. Amlouk, Structural optical magnetic properties of Co doped  $\alpha\text{-MoO}_3$  sprayed thin films, *Sens. Actuators, A*, 2017, **253**, 198-209.
- 2 O. Kamoun, A. Boukhachem, S. Alleg, B. Jeyadevan and M. Amlouk, Physical study of nano-structured  $\text{MoO}_3$  films codoped with cobalt and nickel in which there is a ferro-diamagnetic transition, *J. Alloys Compd.*, 2018, **741**, 847-854.

- 3 S.K.S. Patel, K. Dewangan and N.S. Gajbhiye, Synthesis and room temperature d0 ferromagnetic properties of  $\alpha$ -MoO<sub>3</sub> nanofibers, *J. Mate. Sci. Techno.*, 2015, **31**, 453-457.
- 4 Y. Mao, W. Li, X. Sun, Y. Ma, J. Xia, Y. Zhao, X. Lu, J. Gan, Z. Liu, J. Chen, P. Liu and Y. Tong, Room-temperature ferromagnetism in hierarchically branched MoO<sub>3</sub> nanostructures, *CrystEngComm*, 2012, **14**, 1419-1424.
- 5 J. Zhang, J. Fu, F. Shi, Y. Peng, M. Si, L. Cavallo and Z. Cao, Hydrogen atom induced magnetic behaviors in two-dimensional materials: insight on origination in the model of alpha-MoO<sub>3</sub>, *Nanoscale*, 2018, **10**, 14100-14106.
- 6 D.J. Lee, Y. Lee, Y.H. Kwon, S.H. Choi, W. Yang, D.Y. Kim and S. Lee, Room-temperature ferromagnetic ultrathin alpha-MoO<sub>3</sub>:Te nanoflakes, *ACS Nano*, 2019, **13**, 8717-8724.
